# Supplementary material for: Robust Adamantane-Based Membranes with Enhanced Conductivity for Vanadium Flow Battery Application
Source: MDPI journal article supplement (doi:10.3390/polym14081552), 2022-04-11
Supplement: s1 [file s1]

## Supplementary Materials

# Robust adamantane-based membranes with enhanced conductivity for vanadium flow battery application

Bengui Zhang<sup>1,2\*</sup>, Xueting Zhang<sup>1</sup>, Qian Liu<sup>2</sup>, Yanshi Fu<sup>1</sup>, Zhirong Yang<sup>1</sup>, Haohan Jiang<sup>1</sup>, Enlei Zhang<sup>1</sup>, Kangjun Wang<sup>1\*</sup>, Guosheng Wang<sup>1</sup>, Zhigang Zhang<sup>1</sup>, Shouhai Zhang<sup>2\*</sup>

<sup>1</sup> College of Chemical Engineering, Shenyang University of Chemical Technology, Shenyang, 110142, China

<sup>2</sup> State Key Laboratory of Fine Chemicals, School of Chemical Engineering, Dalian University of Technology, Dalian, 116024, China

### Materials

Vanadyl sulfate (VOSO<sub>4</sub>, purity 99%, Shanghai Luyuan Fine Chemical Plant), benzimidazole (98.0%, Shanghai Aladdin Biochemical Technology Co., Ltd.), 1-Methyl-2-pyrrolidinone (NMP), and other reagents were used as received. All other reagents were analytically pure, and they were obtained commercially and used as received.

Nafion 212 membrane was pre-treated by immersing in hot deionized water (80 °C) for 1 h, and the membrane was immersed in 3 wt. % H<sub>2</sub>O<sub>2</sub> solution at 80 °C for 1 h. After that, the membrane was soaked in 1 M H<sub>2</sub>SO<sub>4</sub> at 80 °C for 1 h, then washed with deionized water and stored in deionized water.

### Synthesis of CAPEK

Chloromethylated adamantane containing poly(aryl ether ketone) (CAPEK) was provided as follows [1]. Adamantane containing poly(aryl ether ketone) (10.0 g) had been dissolved in nitrobenzene (500 mL), then chloromethyl ethyl ether (CMEE) (6 mL) and 2 mL SnCl<sub>4</sub> were added to the polymer solution. The temperature of the polymer solution was maintained at 25 °C for 8 h. After this, the solution was poured into ethanol (500 mL) to precipitate the polymer. To remove all the nitrobenzene, the resulting CAPEK was repeatedly reflux extracted for 12 h using a Soxhlet extractor with ethanol as the solvent and then dried under vacuum at 60 °C for 48 h. The degree of chloromethylation (DC) was then determined using <sup>1</sup>H NMR[2], and CAPEK with DC= 0.5 was prepared.

### Characterization Methods

---

\* Corresponding author. Tel. :+86 024 89386239; E-mail: zhangbgsc@syuct.edu.cn (B. Zhang); wangkj\_dut@syuct.edu.cn (K. Wang); zhangshh@dlut.edu.cn (S. Zhang)

$^1\text{H}$  NMR spectra of the CAPEK polymer were obtained using a Bruker Avance 500 M and  $\text{CDCl}_3$  as the test solvent.

FTIR spectra of the membranes were obtained using a Varian 6400 FT-IR spectrometer (32 scans,  $4\text{ cm}^{-1}$  resolution, wavenumber range  $4000\text{--}500\text{ cm}^{-1}$ ).

Acid doping level (ADL) and swelling ratio of membranes were tested according to method[3]. ADL is defined as the molar ratio of acid to PAPEK repeat unit in each doped membrane. PAPEK membranes were immersed in  $\text{H}_3\text{PO}_4$  (85%) for 4 h at different temperatures ( $60^\circ\text{C}$ ,  $90^\circ\text{C}$ , and  $130^\circ\text{C}$ ). Then, the membrane was wiped with filter papers and dried at  $80^\circ\text{C}$  until constant weight, and the ADL was determined with equation (1):

$$\text{ADL} = \frac{W_{\text{acid}} - W_{\text{dry}}}{W_{\text{dry}}} \times \frac{M_{\text{polymer}}}{M_{\text{acid}}} \quad (1)$$

where  $W_{\text{dry}}$  and  $W_{\text{acid}}$  are the weights of the PAPEK membrane before and after the doping experiment, respectively.  $M_{\text{acid}}$  and  $M_{\text{polymer}}$  are the molecular weights of  $\text{H}_3\text{PO}_4$  and repeat units of PAPEK, respectively.

The ion exchange capacity (IEC) test of membrane. PAPEK-90 membrane samples were soaked in 1M HCl (200mL) for 24 h to exchange the  $\text{HSO}_4^-$  form into the  $\text{Cl}^-$  form, then the membrane samples were washed with deionized water and soaked in 1000 mL of deionized water for 24 h to remove residual HCl. Then the Cl-type membrane samples were dried in a vacuum oven at  $60^\circ\text{C}$  for 24h, and weighed as  $M$ . And then, PAPEK membrane samples in Cl-form were measured with titration method using 0.05 M  $\text{AgNO}_3$  and a potentiometric titrator (ZD-2, Shanghai INESA & Scientific Instrument Co., Ltd, China).

IEC was determined using the following equation:

$$\text{IEC (mmol g}^{-1}\text{)} = \frac{V_{\text{AgNO}_3} \times 0.05}{M} \times 100\%$$

where  $M$  is the mass of the dried membrane sample in chloride form,  $V_{\text{AgNO}_3}$  is the used volume of  $\text{AgNO}_3$  solution.

The hydroxyethylpiperazine content of PAPEK membrane. One unit of protonated piperazine group will bind to 2 units of Cl ions. Therefore, the piperazine content of the PAPEK membrane is half the ion exchange capacity (IEC) of the PAPEK membrane (Cl form), which is calculated as  $\text{IEC} / 2$ .

The swelling ratio of PAPEK membranes. The PAPEK membrane samples were dried in a vacuum oven ( $60^\circ\text{C}$ , 24 hours) and cut into membrane samples with a length and width of  $76\text{mm} \times 26\text{mm}$ , and the area ( $A_{\text{dry}}$ ) was calculated. Next, after the  $\text{H}_3\text{PO}_4$  selective swelling process, filter paper was used to remove residual acid from the membrane samples, then the length and width of the membrane were measured with a Vernier caliper ( $0.01\text{mm}$ ) and the area ( $A_{\text{acid}}$ ) was calculated. The length and width measurement errors were lower than 0.13%

and 0.38%, respectively. The swelling ratio of doped membranes[4] was calculated with equation (2).

$$S_{area} = \frac{A_{acid} - A_{dry}}{A_{dry}} \quad (2)$$

$A_{dry}$  is the area value of the dry membrane before membrane doping.  $A_{acid}$  is the area value of the membrane after membrane doping.

Acid doping level (ADL) and swelling ratio of PAPEK membranes after  $H_3PO_4$  pre-swelling process then immersed in 3 M  $H_2SO_4$  were tested.  $ADL_{H_2SO_4}$  is defined as the molar ratio of  $H_2SO_4$  to PAPEK repeat unit in each doped membrane. PAPEK membranes after  $H_3PO_4$  pre-swelling process were then immersed in 3M  $H_2SO_4$  for 24 h at room temperature. Then, the membrane was wiped with filter papers and dried at 80 °C until constant weight, and the  $ADL_{H_2SO_4}$  was determined with equation (3):

$$ADL_{H_2SO_4} = \frac{W_{H_2SO_4} - W_{dry}}{W_{dry}} \times \frac{M_{polymer}}{M_{H_2SO_4}} \quad (3)$$

where  $W_{dry}$  and  $W_{H_2SO_4}$  are the weights of the PAPEK membrane before and after the doping experiment, respectively.  $M_{H_2SO_4}$  and  $M_{polymer}$  are the molecular weights of  $H_2SO_4$  and repeat units of PAPEK, respectively.

The swelling ratio of PAPEK membranes after the  $H_3PO_4$  pre-swelling process then immersed in 3 M  $H_2SO_4$  was calculated with equation (4).

$$S_{H_2SO_4} = \frac{A_{H_2SO_4} - A_{dry}}{A_{dry}} \quad (4)$$

$A_{dry}$  is the area value of the dry membrane before membrane doping in acid.  $A_{H_2SO_4}$  is the area value of the membrane after  $H_3PO_4$  pre-swelling process, then immersed in 3 M  $H_2SO_4$ .

Area resistance ( $R$ ) was determined using AC impedance technique (100 kHz to 20 Hz, AC amplitude 10 mV) (Wayne Kerr 4310, UK). The resistance test cell has two half-cells which were separated with the membrane (effective area, 0.636 cm<sup>2</sup>) and filled with vanadium electrolyte (1.5 M  $VO_2SO_4$  in 3 M  $H_2SO_4$ ). Area resistance was calculated using the following equation (5):

$$R (\Omega \text{ cm}^2) = (R_1 - R_0) \times 0.636 \quad (5)$$

where  $R_1$  is the resistance of test cell with membrane,  $R_0$  is the resistance of test cell without membrane. The conductivity ( $\delta$ ) was calculated using the equation:

$$\delta = L/R$$

where  $L$  was the thickness of membrane and  $R$  was the area resistance of the membrane in 1.5 M  $VO_2SO_4$  in 3 M  $H_2SO_4$ , respectively.

Membrane mechanical strength testing. Membranes were measured using a mechanical testing instrument with a standard test method for tensile properties of thin plastic sheeting ASTM D 882-02. The testing speed was 5 mm/min, and the initial gage length was 50 mm at

atmosphere conditions (room temperature, 50% relative humidity). For each membrane, five membrane samples (10 mm × 100mm, 40-45 um thickness) were tested, and their average value was calculated.

Permeability measurements were performed with diffusion cells. The diffusion cell had two half-cells, and the membrane was sandwiched between two half-cells (effective membrane area, 7.068 cm<sup>2</sup>), one half-cell filled with 30 mL vanadium solution (1.5 M VOSO<sub>4</sub> in 3 M H<sub>2</sub>SO<sub>4</sub>), and the other half-cell filled with 30 mL MgSO<sub>4</sub> solution (1.5 M MgSO<sub>4</sub> in 3 M H<sub>2</sub>SO<sub>4</sub>). The absorbance value of VO<sup>2+</sup> in MgSO<sub>4</sub> solution was determined periodically with a UV-VIS spectrophotometer at 764 nm. Permeability was calculated with the equation (6):

$$V_B \frac{dC_B(t)}{dt} = S \frac{P}{L} (C_A - C_B(t)) \quad (6)$$

where  $V_B$  is the volume of MgSO<sub>4</sub> solution;  $t$  is the test time,  $S$  is the effective membrane area;  $L$  is the thickness of membrane;  $P$  is the permeability of VO<sup>2+</sup>;  $C_A$  is the concentration of VO<sup>2+</sup> in vanadium solution;  $C_B$  was the concentration of VO<sup>2+</sup> in MgSO<sub>4</sub> solution.

Small angle X-ray scattering (SAXS) testing of membranes. Membrane samples were soaked in water for 24h before the SAXS test. SAXS patterns of the membranes were conducted on a Bruker D8 Advance high resolution diffractometer between 0.05° and 10°. The scattering vector was calculated according to equation (7):

$$q = \frac{4\pi \sin \theta}{\lambda} \quad (7)$$

where  $2\theta$  is the scattering angle and  $\lambda$  is the scattering wavelength, 0.1541 nm.

The Bragg spacing was calculated as following equation (8):

$$d = \frac{2\pi}{q} \quad (8)$$

### VRFB cell test

VRFB performance measurements were performed using previously reported method[5]. The experimental membranes were sandwiched between two carbon felt electrodes (effective area 5 cm<sup>2</sup>, pre-treated in a muffle furnace at 500 °C in the air for four h before use), and this sandwich was clamped between two graphite plates to form a VRFB. The electrolytes for the experimental VRFBs were 20 mL 1.5 M V<sup>2+</sup>/V<sup>3+</sup> in 3.0 M H<sub>2</sub>SO<sub>4</sub> and 20 mL 1.5 M VO<sup>2+</sup>/VO<sub>2</sub><sup>+</sup> in 3.0 M H<sub>2</sub>SO<sub>4</sub>. The negative electrolyte and positive electrolyte were pumped through VRFB. Battery tests were conducted at 25°C using a Neware 5V/3A battery test system. The charge cut-off voltage and discharge cut-off voltage were 1.65 V and 0.8 V, respectively. Cycling tests of VRFB were obtained at a constant current density of 160 mA cm<sup>-2</sup> and 200 mA cm<sup>-2</sup>. Due to the vanadium ion imbalance between the positive and negative electrolytes after extended VRFB cycling, the electrolyte in the cell was replaced with a new electrolyte after each 100 cycle sequence.

The DS of CAPEK was defined as the number of chloromethyl groups per polymer repeating unit. <sup>1</sup>H NMR analysis was used to calculate the degree of substitution (DS) of CAPEK. In the <sup>1</sup>H NMR spectrum of CAPEK, the methylene proton in the chloromethyl group appeared at a new peak (4.64 ppm). Therefore, DS is estimated from the integral ratio of 4.64 ppm of -CH<sub>2</sub>Cl (H5) to the intact protons (H4, 7.79 ppm) that do not react during the chloromethylation reaction [1,6,7]. The DS of CAPEK was calculated according to the equation: [DS=2A<sub>5</sub> / A<sub>4</sub>],

where  $A_5$  is the intensity value of the H-5 protons (4.64 ppm), and  $A_4$  is the intensity value of the H-4 protons (7.79 ppm) (Figure S1).

$^1\text{H}$  NMR for CAPEK, Figure S1. (500 MHz,  $\text{CDCl}_3$ ),  $\delta$ = ppm: 7.90-7.60 (4H, ortho  $\text{C}_6\text{H}_2\text{COC}_6\text{H}_2$ ), 7.5-7.3 (4H,  $\text{C}_6\text{H}_2(\text{C}_{10}\text{H}_{14})\text{C}_6\text{H}_2$ ), 7.10-6.85 (8H,  $2\text{C}_6\text{H}_2\text{OC}_6\text{H}_2$ ), 4.64 ( $\text{CH}_2\text{Cl}$ ), 3.45-1.55 (14H,  $\text{C}_{10}\text{H}_{14}$ ).

$^1\text{H}$  NMR for APEK, Figure S2. (500 MHz,  $\text{CDCl}_3$ ),  $\delta$ = ppm: 7.90-7.60 (4H, ortho  $\text{C}_6\text{H}_2\text{COC}_6\text{H}_2$ ), 7.5-7.3 (4H,  $\text{C}_6\text{H}_2(\text{C}_{10}\text{H}_{14})\text{C}_6\text{H}_2$ ), 7.10-6.85 (8H,  $2\text{C}_6\text{H}_2\text{OC}_6\text{H}_2$ ), 3.45-1.55 (14H,  $\text{C}_{10}\text{H}_{14}$ ).

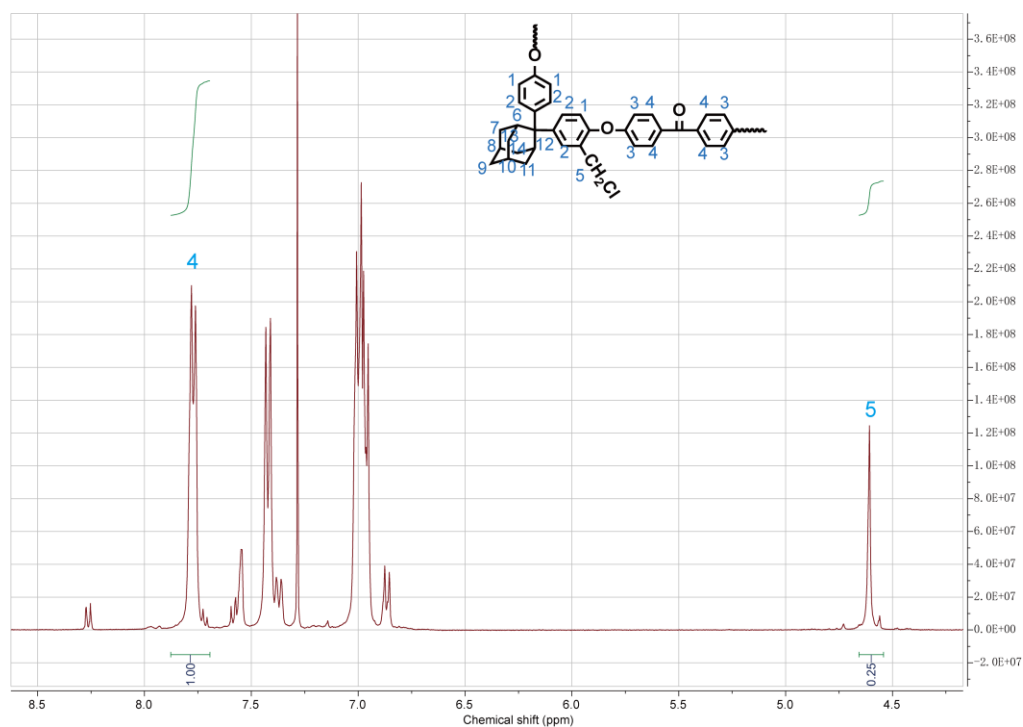

Figure S1.  $^1\text{H}$  NMR of CAPEK

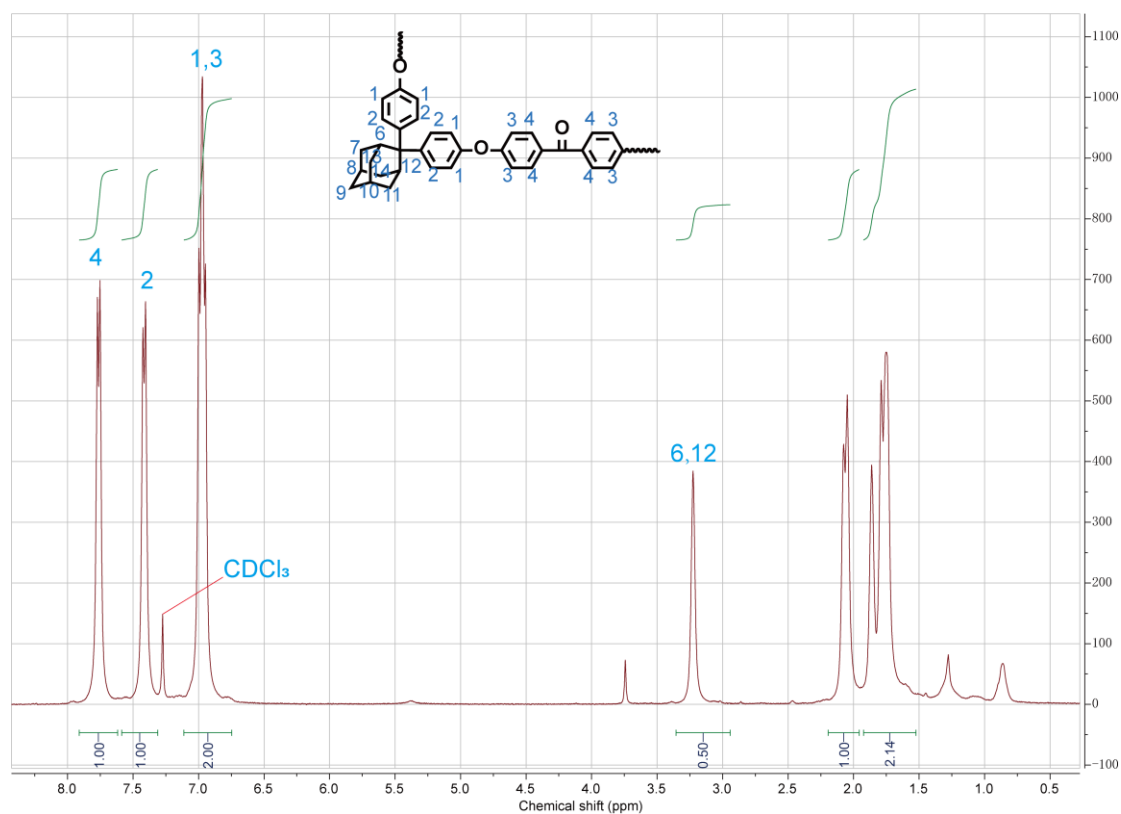

Figure S2.  $^1\text{H}$  NMR of APEK

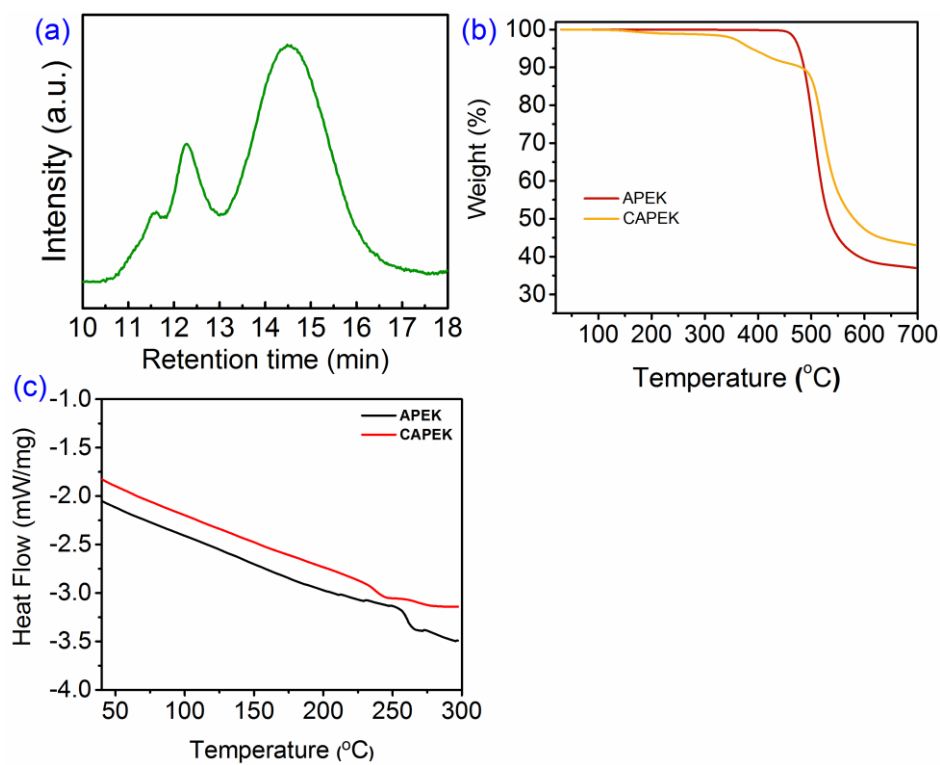

Figure S3 (a) GPC of APEK [8]; (b) TGA of APEK and CAPEK [1]; (c) DSC of APEK and CAPEK [1]

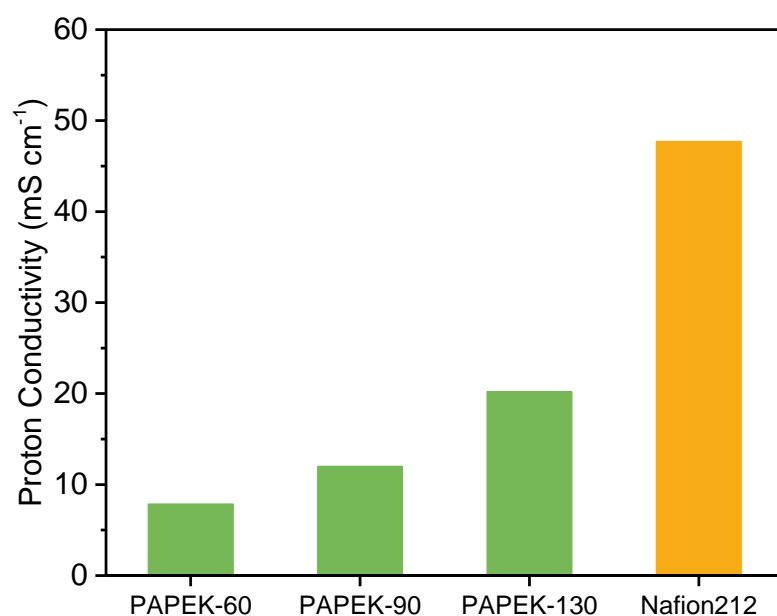

Figure S4 Conductivity of PAPEK and Nafion212 membranes in 1.5M VO<sup>2+</sup> in 3M H<sub>2</sub>SO<sub>4</sub>

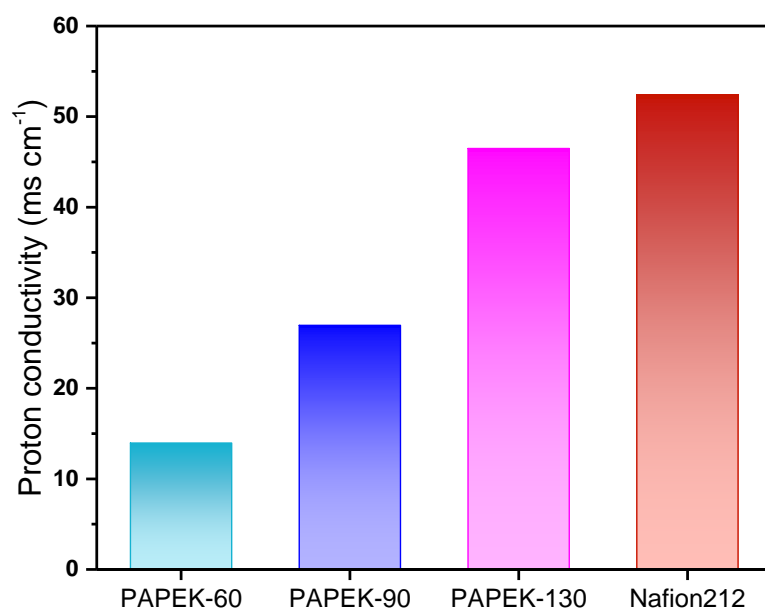

Figure S5 Proton conductivity of PAPEK and Nafion212 membranes in 3M H<sub>2</sub>SO<sub>4</sub>

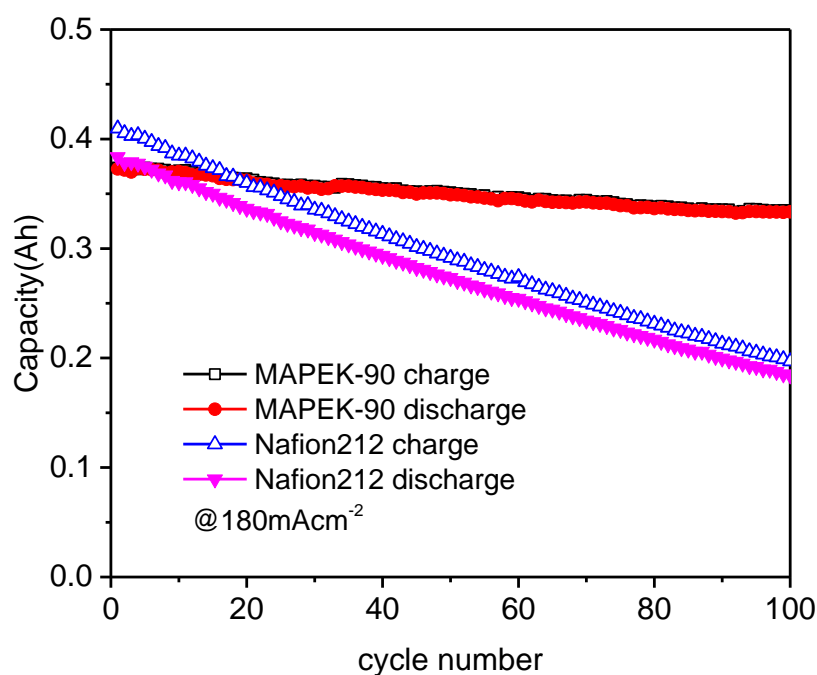

Figure S6 Charge-discharge capacities of VFB with PAPEK-90 and Nafion212 membranes

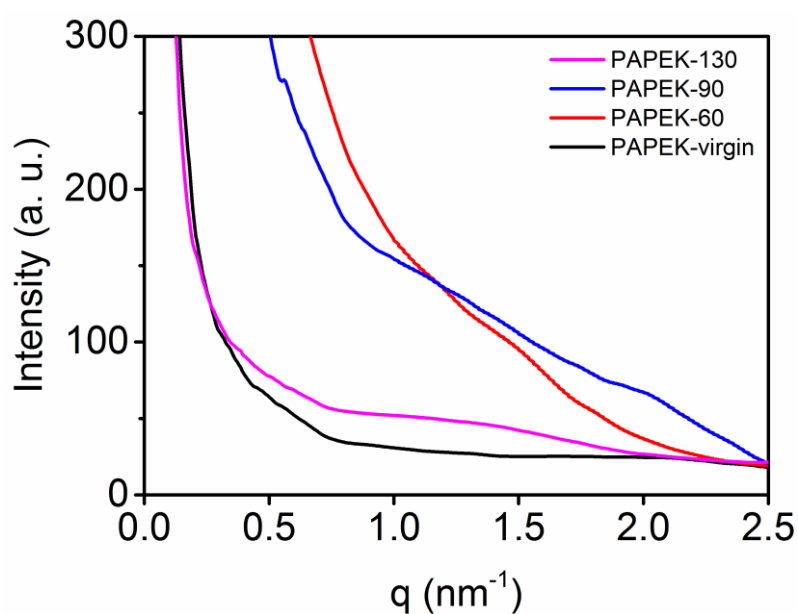

Figure S7 SAXS of PAPEK membranes

#### Reference

1. Zhang, B.; Wang, Q.; Guan, S.; Weng, Z.; Zhang, E.; Wang, G.; Zhang, Z.; Hu, J.; Zhang, S. High performance membranes based on new 2-adamantane containing poly(aryl ether ketone) for vanadium redox flow battery applications. *Journal of Power Sources* **2018**, 399, 18-25, doi:10.1016/j.jpowsour.2018.07.050.



2. Zhang, B.; Zhang, S.; Weng, Z.; Wang, G.; Zhang, E.; Yu, P.; Chen, X.; Wang, X. Quaternized adamantane-containing poly(aryl ether ketone) anion exchange membranes for vanadium redox flow battery applications. *Journal of Power Sources* **2016**, *325*, 801-807, doi:10.1016/j.jpowsour.2016.06.101.
3. Peng, S.; Yan, X.; Zhang, D.; Wu, X.; Luo, Y.; He, G. A H<sub>3</sub>PO<sub>4</sub> preswelling strategy to enhance the proton conductivity of a H<sub>2</sub>SO<sub>4</sub>-doped polybenzimidazole membrane for vanadium flow batteries. *RSC Advances* **2016**, *6*, 23479-23488, doi:10.1039/c6ra00831c.
4. Peng, S.; Wu, X.; Yan, X.; Gao, L.; Zhu, Y.; Zhang, D.; Li, J.; Wang, Q.; He, G. Polybenzimidazole membranes with nanophase-separated structure induced by non-ionic hydrophilic side chains for vanadium flow batteries. *Journal of Materials Chemistry A* **2018**, *6*, 3895-3905, doi:10.1039/c7ta08790j.
5. Zhang, B.; Wang, F.; Guan, S.; Zhao, M.; Zhang, E.; Wang, G.; Zhang, Z.; Liu, X.; Zhang, S. Pyridinium functionalized, 2-adamantane containing poly(aryl ether ketone) membranes for use in vanadium redox flow batteries. *Journal of Power Sources* **2020**, *477*, 229011, doi:10.1016/j.jpowsour.2020.229011.
6. Zhang, B.; Zhang, S.; Xing, D.; Han, R.; Yin, C.; Jian, X. Quaternized poly(phthalazinone ether ketone ketone) anion exchange membrane with low permeability of vanadium ions for vanadium redox flow battery application. *Journal of Power Sources* **2012**, *217*, 296-302, doi:10.1016/j.jpowsour.2012.06.027.
7. Hossain, M.A.; Jang, H.; Sutradhar, S.C.; Ha, J.; Yoo, J.; Lee, C.; Lee, S.; Kim, W. Novel hydroxide conducting sulfonium-based anion exchange membrane for alkaline fuel cell applications. *International Journal of Hydrogen Energy* **2016**, *41*, 10458-10465, doi:10.1016/j.ijhydene.2016.01.051.
8. Zhang, B.; Fu, Y.; Liu, Q.; Zhang, X.; Yang, Z.; Jiang, H.; Zhang, E.; Wang, K.; Wang, G.; Zhang, Z.; et al. Steric-hindrance benzimidazole constructed highly conductive and robust membrane for vanadium flow battery. *Journal of Membrane Science* **2022**, *646*, doi:10.1016/j.memsci.2022.120254.
